# Supplementary material for: Genetics redraws pelagic biogeography of Calanus
Source: PubMed Central journal article supplement (PMC5746537; doi:10.1098/rsbl.2017.0588), 2017-12-20
Supplement: rsbl20170588supp1.pdf [file rsbl20170588supp1.pdf]

## **Electronic Supplementary Material, Choquet et al.**

From: Genetics redraws pelagic biogeography of *Calanus*

Marvin Choquet<sup>1\*</sup>, Maja Hatlebakk<sup>1,2</sup>, Anusha KS Dhanasiri<sup>1</sup>, Ksenia Kosobokova<sup>3</sup>,  
Irina Smolina<sup>1</sup>, Janne E Søreide<sup>2</sup>, Camilla Svensen<sup>4</sup>, Webjørn Melle<sup>5</sup>, Sławomir  
Kwaśniewski<sup>6</sup>, Ketil Eiane<sup>1</sup>, Malin Daase<sup>4</sup>, Vigdis Tverberg<sup>1</sup>, Stig Skreslet<sup>1</sup>, Ann  
Bucklin<sup>7</sup>, Galice Hoarau<sup>1</sup>

<sup>1</sup>Faculty of Biosciences and Aquaculture, Nord University, Bodø, Norway

<sup>2</sup>Department of Arctic Biology, The University Centre in Svalbard, Longyearbyen, Norway

<sup>3</sup>Institute of Oceanology, Russian Academy of Sciences, Moscow, Russia

<sup>4</sup>Department of Arctic and Marine Biology, UiT-the Arctic University of Norway, Tromsø, Norway

<sup>5</sup>Institute of Marine Research, Bergen, Norway

<sup>6</sup>Institute of Oceanology, Polish Academy of Sciences, Sopot, Poland

<sup>7</sup>University of Connecticut, Groton, USA

**Supplementary1:** Sampling information and molecular-based *Calanus* species composition within samples

**Supplementary2:** Phylogenetic relationships among 16S rDNA individual sequences of *Calanus finmarchicus*, *C. glacialis*, *C. hyperboreus* and *C. helgolandicus*

**Supplementary3** (separate excel file): Test of congruence of *Calanus* species identification between 6 nuclear InDel markers and mitochondrial 16S rDNA, for individuals from the North Atlantic and Arctic Oceans

**Supplementary4** (separate excel file): Test of congruence of *Calanus* species identification between 6 nuclear InDel markers and mitochondrial 16S rDNA for *Calanus finmarchicus* (*Cfin*) and *C. glacialis* (*Cgla*) in Saltenfjord/Skjerstadvjord accompanied with prosome length measurements and developmental stage information

**Supplementary5:** Frequency distributions of prosome length for *Calanus glacialis* and *C. finmarchicus* at developmental stage **(a)** CV and **(b)** adult female in the region of Saltenfjord / Skjerstadvjord

**Supplementary6:** Genotype admixture analysis based on nuclear InDels shows no hybrids between *Calanus finmarchicus* and *C. glacialis*

**Supplementary7:** Supplementary Protocols

**Supplementary8:** Sources of literature used for tracing the morphologically based distribution ranges of *Calanus* species

**References of the Supplementary Material**

## SUPPLEMENTARY 1

Sampling information and molecular-based *Calanus* species composition within samples. N individuals per sample were genotyped with nuclear InDel markers. Samples relative proportions of *C. glacialis* (*Cgla*), *C. finmarchicus* (*Cfin*), *C. hyperboreus* (*Chyp*) and *C. helgolandicus* (*Chel*) are reported in percentage. In the Laptev Sea and the Nansen Basin, only species presence (x) or absence (-) is reported.

| Locations          | GPS              | Date       | Depth    | N   | %Cgla | %Cfin | %Chyp | %Chel | Collector            |
|--------------------|------------------|------------|----------|-----|-------|-------|-------|-------|----------------------|
| North Pole         | 89°43 N 14°11 E  | 4/9/2012   | 100-0 m  | 48  | 98%   | 0%    | 2%    | 0%    | J. Søreide           |
| Nansen Basin       | 87° N 55°47 E    | 10/4/2016  | 4400-0 m | 94  | x     | x     | -     | -     | K. Kosobokova        |
| Ice West Svalbard  | 81°22 N 4°27 E   | 10/1/2012  | 200-0 m  | 48  | 25%   | 71%   | 4%    | 0%    | I. Smolina           |
| Ice North Svalbard | 80°58 N 14°41 E  | 1/15/2016  | 200-0 m  | 44  | 9%    | 91%   | 0%    | 0%    | M. Choquet           |
| West Greenland 1   | 78°42 N 70°43 W  | 9/6/2013   | 100-0 m  | 48  | 40%   | 0%    | 60%   | 0%    | J. Søreide           |
| Laptev Sea         | 78°30 N 113°01 E | 9/6/2013   | 100-0 m  | 91  | x     | x     | x     | -     | E. Abramova          |
| Isfjord            | 78°19 N 15°09 E  | 6/5/2016   | 20-0 m   | 138 | 64%   | 35%   | 1%    | 0%    | M. Hatlebakk         |
| West Greenland 2   | 77°51 N 71°49 W  | 9/9/2013   | 95-0 m   | 48  | 6%    | 0%    | 94%   | 0%    | J. Søreide           |
| Van Mijenfjord     | 77°46 N 15°02 E  | 6/3/2016   | 20-0 m   | 91  | 86%   | 13%   | 1%    | 0%    | M. Hatlebakk         |
| Chukchi Sea        | 76°24 N 162°14 W | 7/27/2016  | 300-0 m  | 60  | 45%   | 0%    | 55%   | 0%    | A. Bucklin           |
| West Greenland 3   | 76°23 N 84°30 W  | 9/15/2013  | 100-0 m  | 48  | 38%   | 0%    | 63%   | 0%    | J. Søreide           |
| Bjørnøya 1         | 74°50 N 18°51 E  | 08/08/2012 | 50-0 m   | 48  | 67%   | 33%   | 0%    | 0%    | I. Smolina           |
| Bjørnøya 2         | 74°30 N 9°01 E   | 8/9/2013   | 200-0 m  | 47  | 0%    | 100%  | 0%    | 0%    | I. Smolina           |
| Fugløya-Bjørnøya   | 72°59 N 19°27 E  | 8/7/2013   | 100-0 m  | 47  | 0%    | 100%  | 0%    | 0%    | I. Smolina           |
| Porsangerfjord 1   | 70°43 N 25°44 E  | 8/21/2013  | 150-0 m  | 46  | 0%    | 100%  | 0%    | 0%    | F. Norrbin           |
| Porsangerfjord 2   | 70°40 N 25°39 E  | 6/3/2016   | 120-0 m  | 48  | 0%    | 100%  | 0%    | 0%    | C. Svensen           |
| Off-Tromsø         | 70°34 N 19°14 E  | 1/8/2016   | 300-0 m  | 79  | 6%    | 79%   | 0%    | 15%   | M. Choquet           |
| Lopphavet          | 70°25 N 21°50 E  | 6/2/2016   | 200-0 m  | 48  | 8%    | 92%   | 0%    | 0%    | F. Norrbin           |
| Østerbotn          | 70°06 N 25°09 E  | 8/25/2013  | 100-0 m  | 39  | 8%    | 90%   | 2%    | 0%    | F. Norrbin           |
| Gimsøy 1           | 69°57 N 9°35 E   | 8/5/2013   | 200-0 m  | 47  | 0%    | 100%  | 0%    | 0%    | I. Smolina           |
| Balsfjord 1        | 69°21 N 19°13 E  | 5/31/2016  | 170-0 m  | 39  | 90%   | 8%    | 2%    | 0%    | C. Svensen           |
| Balsfjord 2        | 69°21 N 19°13 E  | 5/3/2016   | 170-0 m  | 46  | 28%   | 52%   | 20%   | 0%    | C. Svensen           |
| Gimsøy 2           | 69°2 N 12°17 E   | 8/5/2012   | 200-0 m  | 46  | 0%    | 100%  | 0%    | 0%    | I. Smolina           |
| North Iceland      | 68°48 N 18°23 W  | 5/12/2013  | 200-0 m  | 48  | 0%    | 6%    | 94%   | 0%    | I. Smolina           |
| Tysfjord           | 68°07 N 16°11 E  | 4/9/2016   | 200-0 m  | 37  | 5%    | 60%   | 35%   | 0%    | F. Norrbin           |
| Vestfjord 1        | 68°06 N 14°28 E  | 5/30/2016  | 270-0 m  | 49  | 12%   | 76%   | 10%   | 2%    | M. Krogstad          |
| Vestfjord 2        | 68°05 N 14°58 E  | 4/10/2016  | 200-0 m  | 43  | 12%   | 21%   | 67%   | 0%    | F. Norrbin           |
| Vestfjord 3        | 68°02 N 14°27 E  | 6/20/2016  | 290-0 m  | 48  | 8%    | 90%   | 2%    | 0%    | M. Krogstad          |
| Sørfoldfjord 1     | 67°35 N 14°50 E  | 4/20/2016  | 510-0 m  | 43  | 51%   | 42%   | 7%    | 0%    | M. Krogstad          |
| Sørfoldfjord 2     | 67°34 N 15°11 E  | 4/20/2016  | 460-0 m  | 48  | 67%   | 29%   | 4%    | 0%    | M. Krogstad          |
| Sørfoldfjord 3     | 67°30 N 15°28 E  | 4/20/2016  | 480-0 m  | 55  | 76%   | 24%   | 0%    | 0%    | M. Krogstad          |
| Mistfjord 1        | 67°27 N 14°51 E  | 10/29/2013 | 290-0 m  | 40  | 25%   | 70%   | 5%    | 0%    | M. Krogstad          |
| Mistfjord 2        | 67°27 N 14°50 E  | 2/17/2016  | 285-0 m  | 82  | 45%   | 42%   | 13%   | 0%    | M. Krogstad          |
| Saltfjord 1        | 67°16 N 14°38 E  | 2/15/2016  | 375-0 m  | 98  | 42%   | 40%   | 18%   | 0%    | M. Krogstad          |
| Saltfjord 2        | 67°16 N 14°38 E  | 7/6/2016   | 360-0 m  | 93  | 30%   | 69%   | 1%    | 0%    | M. Krogstad          |
| Skjerstadfjord 1   | 67°15 N 14°50 E  | 7/12/2016  | 500-0 m  | 89  | 33%   | 50%   | 17%   | 0%    | M. Krogstad          |
| Skjerstadfjord 2   | 67°11 N 15°26 E  | 2/26/2016  | 385-0 m  | 151 | 61%   | 13%   | 26%   | 0%    | M. Krogstad          |
| Myken 1            | 67°03 N 13°31 E  | 8/3/2016   | 200-0 m  | 48  | 2%    | 96%   | 2%    | 0%    | M. Krogstad          |
| Myken 2            | 66°48 N 12°32 E  | 8/3/2016   | 210-0 m  | 45  | 0%    | 100%  | 0%    | 0%    | M. Krogstad          |
| Myken 3            | 66°46 N 12°30 E  | 8/3/2016   | 95-0 m   | 12  | 0%    | 100%  | 0%    | 0%    | M. Krogstad          |
| Myken 4            | 66°46 N 12°28 E  | 8/3/2016   | 28-0 m   | 11  | 0%    | 73%   | 0%    | 27%   | M. Krogstad          |
| Myken 5            | 66°46 N 12°23 E  | 8/3/2016   | 140-0 m  | 12  | 0%    | 100%  | 0%    | 0%    | M. Krogstad          |
| Myken 6            | 66°45 N 12°28 E  | 8/3/2016   | 95-0 m   | 12  | 0%    | 100%  | 0%    | 0%    | M. Krogstad          |
| North Atlantic 1   | 66°43 N 7°46 W   | 5/8/2013   | 1000-0 m | 46  | 7%    | 80%   | 13%   | 0%    | I. Smolina           |
| White Sea          | 66°33 N 33°43 E  | 8/22/2016  | 100-0 m  | 115 | 100%  | 0%    | 0%    | 0%    | K. Kosobokova        |
| Ranfjord 1         | 66°17 N 14°00 E  | 6/14/2016  | 410-0 m  | 47  | 98%   | 2%    | 0%    | 0%    | M. Krogstad          |
| Ranfjord 2         | 66°14 N 13°24 E  | 6/14/2016  | 275-0 m  | 46  | 63%   | 37%   | 0%    | 0%    | M. Krogstad          |
| Ranfjord 3         | 66°12 N 12°49 E  | 6/14/2016  | 215-0 m  | 45  | 13%   | 87%   | 0%    | 0%    | M. Krogstad          |
| North Atlantic 2   | 65°03 N 00°51 W  | 5/5/2013   | 1000-0 m | 48  | 4%    | 88%   | 8%    | 0%    | I. Smolina           |
| South Iceland      | 63°49 N 24°18 W  | 5/14/2013  | 200-0 m  | 48  | 0%    | 100%  | 0%    | 0%    | I. Smolina           |
| Steinkjer          | 63°49 N 11°18 E  | 6/14/2016  | 50-0 m   | 45  | 0%    | 98%   | 0%    | 2%    | G. Hoarau & K. Eiane |
| North Atlantic 3   | 63°45 N 02°16 E  | 5/4/2013   | 200-0 m  | 47  | 0%    | 100%  | 0%    | 0%    | I. Smolina           |
| Trondheimsfjord    | 63°29 N 10°14 E  | 8/22/2016  | 450-0 m  | 48  | 4%    | 96%   | 0%    | 0%    | Ø. Leiknes           |
| North Atlantic 4   | 62°50 N 28°17 W  | 5/15/2013  | 1000-0 m | 40  | 0%    | 95%   | 5%    | 0%    | I. Smolina           |
| North Atlantic 5   | 62°50 N 02°31 W  | 4/13/2012  | 150-0 m  | 48  | 2%    | 98%   | 0%    | 0%    | S. Basedow           |
| Svinøy             | 62°37 N 05°20 E  | 01/08/12   | 127-0 m  | 51  | 0%    | 86%   | 0%    | 14%   | I. Smolina           |
| Labrador 1         | 62°13 N 57°21 W  | 5/26/2013  | 1000-0 m | 95  | 3%    | 86%   | 11%   | 0%    | I. Smolina           |
| North Atlantic 6   | 61°30 N 10°59 W  | 4/10/2012  | 50-0 m   | 48  | 0%    | 100%  | 0%    | 0%    | S. Basedow           |
| Sognefjord         | 61°11 N 06°35 E  | 6/22/2016  | 200-0 m  | 41  | 0%    | 15%   | 0%    | 85%   | T. Dale              |
| Lurefjord 1        | 60°43 N 05°04 E  | 6/22/2016  | 230-0 m  | 48  | 81%   | 19%   | 0%    | 0%    | M. Choquet           |
| Lurefjord 2        | 60°41 N 05°09 E  | 6/22/2016  | 340-0 m  | 92  | 88%   | 12%   | 0%    | 0%    | M. Choquet           |
| Lurefjord 3        | 60°37 N 05°11 E  | 6/22/2016  | 160-0 m  | 49  | 90%   | 8%    | 0%    | 2%    | M. Choquet           |
| Christianssund     | 60°36 N 38°20 W  | 6/1/2013   | 1000-0 m | 45  | 0%    | 93%   | 7%    | 0%    | I. Smolina           |
| Osterfjord         | 60°34 N 05°24 E  | 6/23/2016  | 550-0 m  | 47  | 4%    | 83%   | 4%    | 9%    | M. Choquet           |
| Sørfjord 1         | 60°31 N 05°21 E  | 6/23/2016  | 487-0 m  | 48  | 0%    | 94%   | 6%    | 0%    | M. Choquet           |
| Sørfjord 2         | 60°28 N 05°40 E  | 6/23/2016  | 360-0 m  | 43  | 0%    | 81%   | 0%    | 19%   | M. Choquet           |
| Sørfjord 3         | 60°26 N 05°30 E  | 6/23/2016  | 225-0 m  | 48  | 0%    | 79%   | 0%    | 21%   | M. Choquet           |
| North Sea          | 60°20 N 01°00 E  | 4/2/2012   | 50-0 m   | 45  | 0%    | 76%   | 0%    | 24%   | S. Basedow           |
| Raunefjord         | 60°17 N 05°08 E  | 6/4/2016   | 180-0 m  | 45  | 0%    | 98%   | 2%    | 0%    | W. Melle             |
| Korsfjord          | 60°11 N 05°12 E  | 6/6/2016   | 200-0 m  | 48  | 0%    | 94%   | 0%    | 6%    | W. Melle             |
| Hardangerfjord     | 59°58 N 05°41 E  | 8/30/2016  | 106-0 m  | 46  | 0%    | 48%   | 0%    | 52%   | A. Mailli            |
| Labrador 2         | 59°47 N 52°16 W  | 5/28/2013  | 1000-0 m | 47  | 0%    | 91%   | 9%    | 0%    | I. Smolina           |
| Oslofjord          | 59°12 N 10°38 E  | 4/16/2016  | 350-0 m  | 51  | 0%    | 63%   | 31%   | 6%    | T. Falkenhaus        |
| Lenefjord          | 58°5 N 07°9 E    | 7/18/2016  | 220-0 m  | 45  | 0%    | 56%   | 11%   | 33%   | K. Eiane             |
| Risørfjord         | 58°44 N 09°15 E  | 4/15/2016  | 160-0 m  | 47  | 0%    | 87%   | 0%    | 13%   | T. Falkenhaus        |
| Grønsfjord         | 58°2 N 07°2 E    | 7/18/2016  | 190-0 m  | 48  | 0%    | 75%   | 8%    | 17%   | K. Eiane             |
| Loch Etive         | 56°27 N 05°11 W  | 9/19/2016  | 130-5 m  | 47  | 0%    | 100%  | 0%    | 0%    | K. Last              |
| Off-Ainort         | 56°51 N 05°53 W  | 7/31/2008  | 20-0 m   | 48  | 0%    | 4%    | 0%    | 96%   | S. Wells             |
| Quebec 1           | 50°26 N 50°42 W  | 5/11/2014  | 200-0 m  | 47  | 0%    | 77%   | 23%   | 0%    | A. Bucklin           |
| Quebec 2           | 45°05 N 53°44 W  | 5/15/2014  | 200-0 m  | 47  | 4%    | 70%   | 26%   | 0%    | A. Bucklin           |
| US Portland        | 42°59 N 68°52 W  | 8/22/2012  | 200-0 m  | 47  | 0%    | 100%  | 0%    | 0%    | A. Bucklin           |
| US New-York        | 40°19 N 69°50 W  | 8/14/2012  | 200-0 m  | 45  | 0%    | 100%  | 0%    | 0%    | A. Bucklin           |
| US Philadelphia    | 39°58 N 72°46 W  | 8/8/2012   | 200-0 m  | 51  | 0%    | 100%  | 0%    | 0%    | A. Bucklin           |

## SUPPLEMENTARY 2

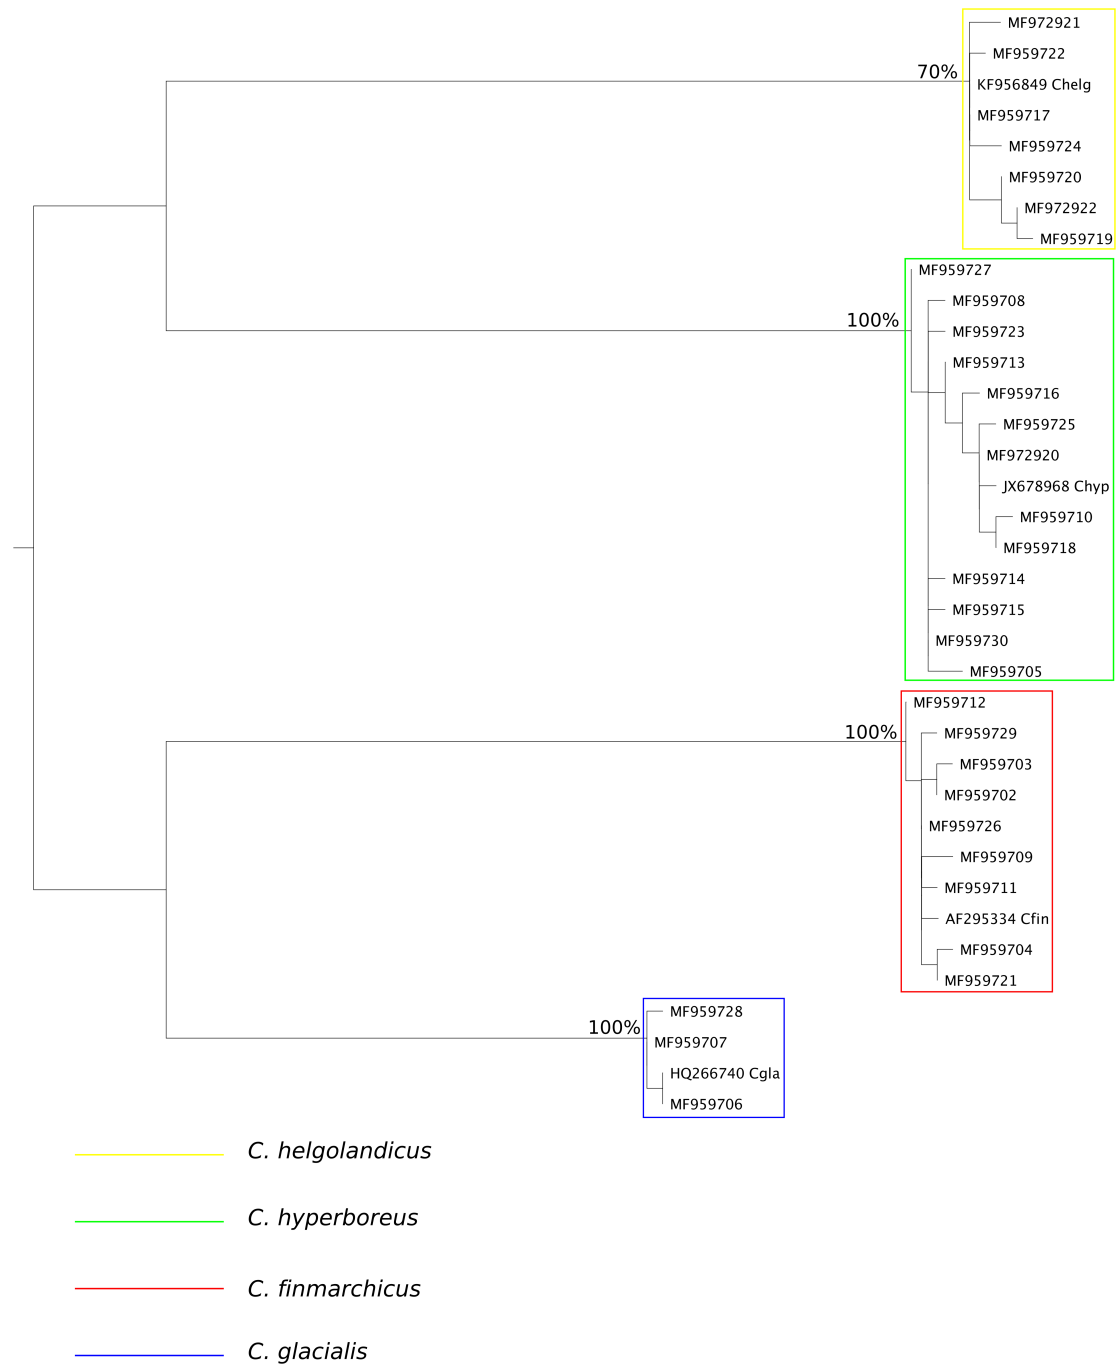

**Phylogenetic relationships among 16S rDNA individual sequences of *Calanus finmarchicus*, *C. glacialis*, *C. hyperboreus* and *C. helgolandicus***

## SUPPLEMENTARY 5

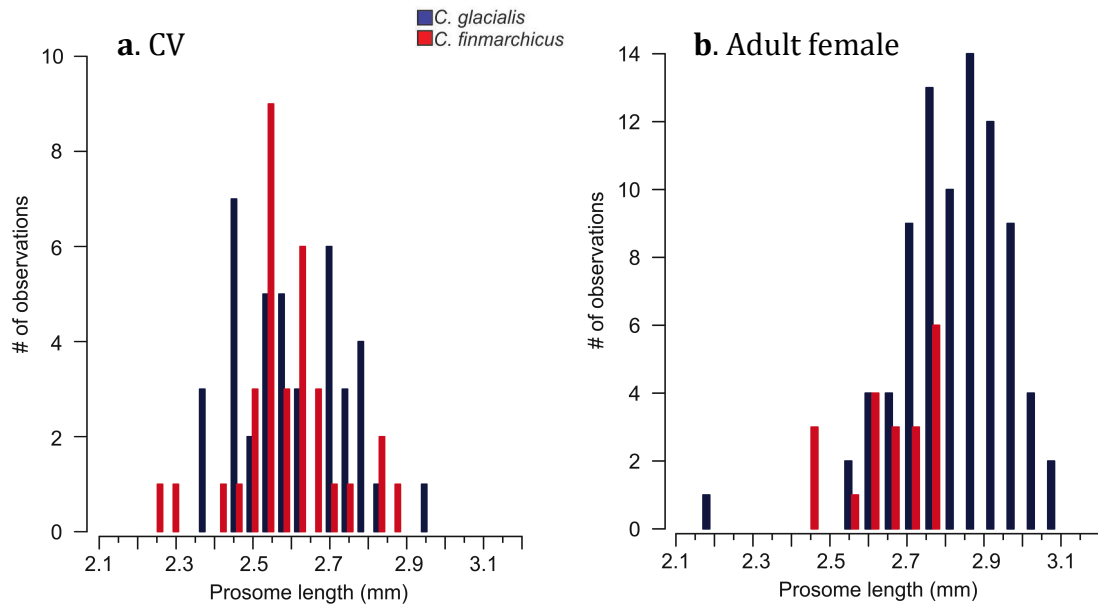

**Frequency distributions of prosome length for *Calanus glacialis* and *C. finmarchicus* at developmental stage (a) CV and (b) adult female in the region of Saltenfjord / Skjerstadvjord**

In total, prosome length of 171 *Calanus* individuals was measured.

## SUPPLEMENTARY 6

### Genotype admixture analysis based on nuclear InDels shows no hybrids between *Calanus finmarchicus* and *C. glacialis*

Bar chart representing genotype admixture analysis results based on nuclear InDel genotypes data, performed using STRUCTURE (v. 2.3.4) after Nielsen *et al.*, 2014[1].

- a. Results from the first set of InDels used (c.f. Supplementary7),
- b. Results from the second set of InDels.

Each individual is represented by a bar filled with one or two distinct colours that identify an individual probability to belong to two clusters (here, green for *C. finmarchicus* and red for *C. glacialis*). In case of F1 hybrids between *C. finmarchicus* and *C. glacialis*, a bar will be nearly equally filled with both colours (which never happened).

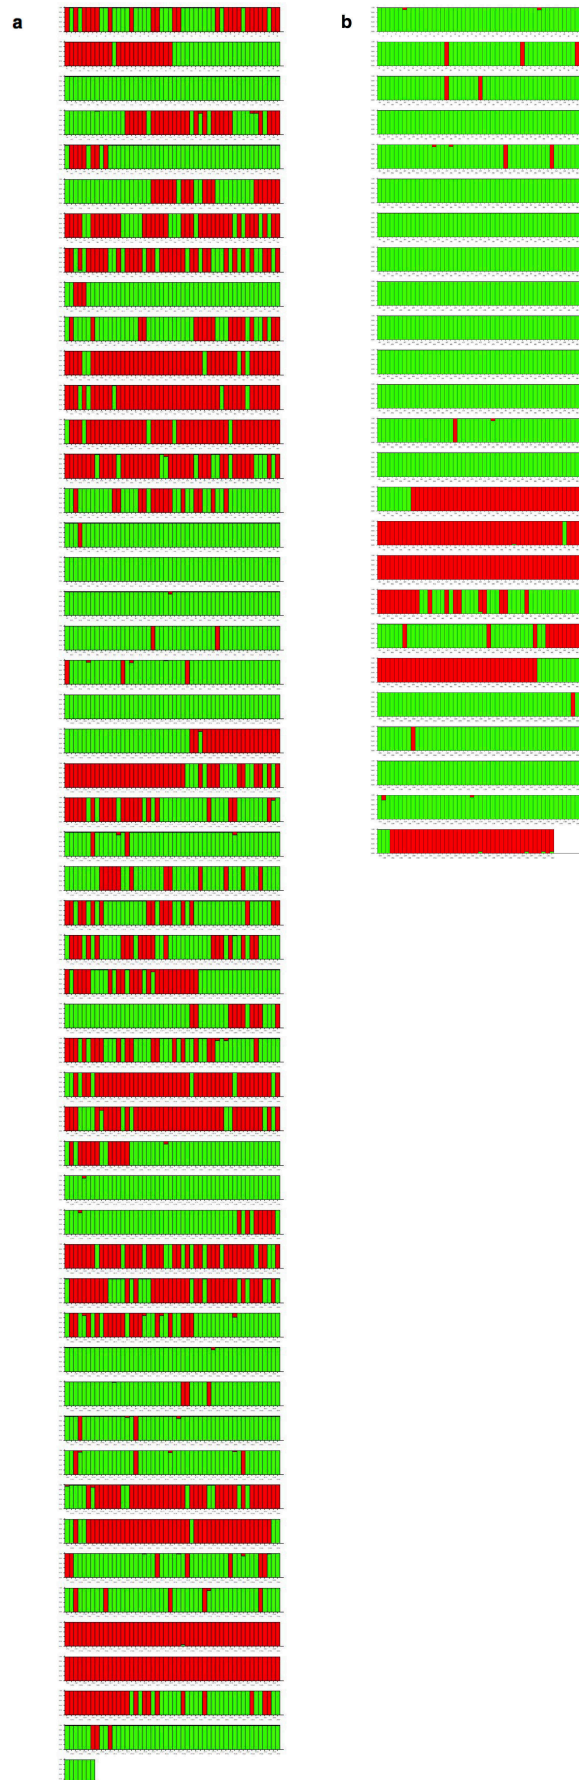

## SUPPLEMENTARY 7

### Supplementary Protocols

#### ❖ DNA extraction:

We extracted DNA from the antennules of each specimen, using the quick and cheap method of HotSHOT DNA extraction[2]:

- 1- Individuals were soaked separately in sterile water to rinse the ethanol;
- 2- One by one, under a stereomicroscope, the 2 antennules were removed from the rest of the body and placed in 50  $\mu$ L of a Lysis Buffer (See HotSHOT protocol for details about composition of buffers[2]) in a 96-well plate;
- 3- The plate was incubated in a thermocycler, 30 minutes at 95°C;
- 4- The plate was subsequently cooled in the fridge (4°C) for 5-10 minutes;
- 5- Finally, 50  $\mu$ L of Neutralizing Solution was added (See HotSHOT protocol for details about composition of buffers[2]).

#### ❖ Molecular species identification:

We amplified a set of 6 nuclear molecular markers, type InDel (polymorphism consists of Insertion or Deletion of nucleotides): G\_150, T\_461, T\_1338, T\_1966, T\_3133 and T\_4700[3] in a single multiplexed Polymerase Chain Reaction (PCR), and genotyped them following the protocol described by Smolina *et al.* (2014)[3]. Four distinct patterns of genotypes were distinguished and assigned to the four different species of *Calanus* based on species-specific alleles defined in Smolina *et al.* (2014)[3]. This method is fast and inexpensive. A total of 96 individuals can be reliably identified within 5 hours, with 100% reliable results for ca. 2 euros/sample. At one point in our study, we had to re-order a new stock of InDel primers from a new provider, and thus had to change the type of fluorescent dye labelling of the forward primers (from 6-FAM, VIC and NED (Life Technologies) to FAM, YAKYE and ATTO550 (Eurofins Genomics)). This resulted in a slight shift of the length of the alleles in the genotyping, thus this second set of data was treated separately. To confirm the species identification, and in order to validate our nuclear markers, we sequenced a portion of the mitochondrial 16S rDNA (ca. 360bp)[4] for 159 individuals from 53 locations selected to represent the full range of sampling, and for 129 individuals from the region of Saltenfjord / Skjerstadvjord, following the same protocol described in Smolina *et al.* (2014)[3]. The obtained sequences were then aligned together with one reference 16S sequence for each species from GenBank<sup>®</sup>: HQ266740 for *C. glacialis*, AF295334 for *C. finmarchicus*, KF956849 for *C. helgolandicus*, and JX678968 for *C. hyperboreus*. This alignment was used to reconstruct a PhyML tree (GTR model) using Geneious version 9.1 (<http://www.geneious.com>)[5]. The resulting tree displayed four clearly distinct groups of sequences corresponding to the four species (see Supplementary2). In all individuals, this approach resulted in the same species identification as the InDel genotyping (Supplementary3-4).

❖ Microsatellite analysis:

To characterize connectivity among newly described population of *C. glacialis* in Norwegian fjords and other regions and compare it to *C. finmarchicus* we performed analysis of population genetic differentiation using sample from 3 locations: Isfjord, Saltfjord and Lurefjord (c.f. Supplementary1). DNA from the antennas of 24 identified (InDels method – see above) individuals per species and per location was used to amplify 10 microsatellites markers[6, 7] by PCR. Nine microsatellite markers were multiplexed into 3 PCR reactions (EL696609, EL585922, and EL773519; FK868270, FG632811, and FK670364; EH666870, EH666474, and EL773359) and one marker, FK867682, was amplified separately. PCR reactions were carried out in a final volume of 5  $\mu$ L, using 2.5  $\mu$ L of Accu-Start Tough Mix<sup>®</sup> (Quanta Biosciences), 0.1  $\mu$ L of each primer at 10  $\mu$ M, and completing with DNA from HotSHOT extraction. Reactions were run on a Veriti<sup>®</sup> 96-well fast thermal cycler (Applied Biosystems). Amplification reactions consisted of Multiplex 1 and FK867682 for 3 min at 95°C; with 35 cycles of: 95°C (30 sec), 55°C (60 sec), and 72°C (60 sec); with one final extension cycle at 72°C for 5 min. Multiplex 2 was amplified by a first cycle at 95°C (3 min), followed by 35 cycles of: 95°C (30 sec), 53°C (60 sec), and 72°C (60 sec); and one final cycle at 72°C (5 min) for extension. Multiplex 3 was run as 95°C (3 min), and then 10 cycles of: 95°C (1 min), touch-down from 68°C (1 min) to 58°C (1 min), and 72°C (1 min); followed by 25 cycles of: 95°C (1 min), 58°C (1 min), and 72°C (1 min); and a final extension cycle at 72°C (5 min). Microsatellite loci were analysed on a 3500XL Genetic Analyzer (Life Technologies) in three multiplex and one singleplex following Nielsen *et al.* (2014)[8]. We used *Genetix* (v. 4.05.2)[9] to estimate the global  $F_{ST}$ , index of population differentiation after Weir & Cockerham[10].

## **SUPPLEMENTARY 8**

### **Sources of literature used for tracing the morphologically based distribution ranges of *Calanus* species**

The map showing the distribution ranges of *Calanus* species in the North Atlantic and Arctic Ocean, as defined from morphological identification of species, presented as Figure 1 of the paper, was mainly based on three different sources: Conover, 1988[11], Barnard et al., 2004[12] for the southern borders of species distributions, and Jaschnov, 1970[13] for the northern borders. Additional complementary sources were: Wassmann et al., 2015[14]; Melle et al., 2014[15]; Estrada et al., 2012[16]; Bonnet et al., 2005[17].



## References:

- [1] Pritchard, J.K., Stephens, M. & Donnelly, P. 2000 Inference of population structure using multilocus genotype data. *Genetics* **155**, 945-959.
- [2] Montero - Pau, J., Gómez, A. & Muñoz, J. 2008 Application of an inexpensive and high - throughput genomic DNA extraction method for the molecular ecology of zooplanktonic diapausing eggs. *Limnology and Oceanography: Methods* **6**, 218-222.
- [3] Smolina, I., Kollias, S., Poortvliet, M., Nielsen, T.G., Lindeque, P., Castellani, C., Moller, E.F., Blanco-Bercial, L. & Hoarau, G. 2014 Genome- and transcriptome-assisted development of nuclear insertion/deletion markers for *Calanus* species (Copepoda: Calanoida) identification. *Molecular ecology resources* **14**, 1072-1079. (doi:10.1111/1755-0998.12241).
- [4] Sanger, F. & Coulson, A.R. 1975 A rapid method for determining sequences in DNA by primed synthesis with DNA polymerase. *Journal of molecular biology* **94**, 441-488.
- [5] Kearse, M., Moir, R., Wilson, A., Stones-Havas, S., Cheung, M., Sturrock, S., Buxton, S., Cooper, A., Markowitz, S. & Duran, C. 2012 Geneious Basic: an integrated and extendable desktop software platform for the organization and analysis of sequence data. *Bioinformatics* **28**, 1647-1649.
- [6] Parent, G.J., Plourde, S. & Turgeon, J. 2012 Natural hybridization between *Calanus finmarchicus* and *C. glacialis* (Copepoda) in the Arctic and Northwest Atlantic. *Limnology and Oceanography* **57**, 1057-1066. (doi:10.4319/lo.2012.57.4.1057).
- [7] Provan, J., Beatty, G.E., Keating, S.L., Maggs, C.A. & Savidge, G. 2009 High dispersal potential has maintained long-term population stability in the North Atlantic copepod *Calanus finmarchicus*. *Proceedings. Biological sciences / The Royal Society* **276**, 301-307. (doi:10.1098/rspb.2008.1062).
- [8] Nielsen, T.G., Kjellerup, S., Smolina, I., Hoarau, G. & Lindeque, P. 2014 Live discrimination of *Calanus glacialis* and *C. finmarchicus* females: can we trust phenological differences? *Marine Biology* **161**, 1299-1306. (doi:10.1007/s00227-014-2419-5).
- [9] Belkhir, K., Borsa, P., Chikhi, L., Raufaste, N. & Bonhomme, F. 1996 GENETIX 4.05, logiciel sous Windows TM pour la génétique des populations. *Laboratoire génome, populations, interactions, CNRS UMR 5000*, 1996-2004.
- [10] Weir, B.S. & Cockerham, C.C. 1984 Estimating F-statistics for the analysis of population structure. *Evolution*, 1358-1370.
- [11] Conover, R. 1988 Comparative life histories in the genera *Calanus* and *Neocalanus* in high latitudes of the northern hemisphere. In *Biology of Copepods* (pp. 127-142, Springer).
- [12] Barnard, R., Batten, S., Beaugrand, G., Buckland, C., Conway, D., Edwards, M., Finlayson, J., Gregory, L., Halliday, N. & John, A. 2004 Continuous plankton records: Plankton atlas of the North Atlantic Ocean (1958-1999). II. Biogeographical charts. *Marine Ecology-Progress Series*, 11-75.
- [13] Jaschnov, W. 1970 Distribution of *Calanus* species in the seas of the northern hemisphere. *Internationale Revue der gesamten Hydrobiologie und Hydrographie* **55**, 197-212.
- [14] Wassmann, P., Kosobokova, K., Slagstad, D., Drinkwater, K., Hopcroft, R., Moore, S., Ellingsen, I., Nelson, R., Carmack, E. & Popova, E. 2015 The contiguous

domains of Arctic Ocean advection: trails of life and death. *Progress in Oceanography* **139**, 42-65.

[15] Melle, W., Runge, J., Head, E., Plourde, S., Castellani, C., Licandro, P., Pierson, J., Jonasdottir, S., Johnson, C. & Broms, C. 2014 The North Atlantic Ocean as habitat for *Calanus finmarchicus*: Environmental factors and life history traits. *Progress in Oceanography* **129**, 244-284.

[16] Estrada, R., Harvey, M., Gosselin, M., Starr, M., Galbraith, P.S. & Straneo, F. 2012 Late-summer zooplankton community structure, abundance, and distribution in the Hudson Bay system (Canada) and their relationships with environmental conditions, 2003–2006. *Progress in oceanography* **101**, 121-145.

[17] Bonnet, D., Richardson, A., Harris, R., Hirst, A., Beaugrand, G., Edwards, M., Ceballos, S., Diekman, R., López-Urrutia, A. & Valdes, L. 2005 An overview of *Calanus helgolandicus* ecology in European waters. *Progress in Oceanography* **65**, 1-53.
